# Supplementary material for: A novel, robust peptidyl-lys metalloendopeptidase from Trametes coccinea recombinantly expressed in Komagataella phaffii
Source: Springer Nature journal article supplement (doi:10.1007/s00253-023-12986-3), 2024-01-13
Supplement: MOESM1 [file 253_2023_12986_MOESM1_ESM.pdf]

# A novel, robust peptidyl-lys metalloendopeptidase from *Trametes coccinea* recombinantly expressed in *Komagataella phaffii*

Uzair Ahmed<sup>1,2</sup>, Tobias Stadelmann<sup>1</sup>, Daniel Heid<sup>1</sup>, Berit Würtz<sup>3</sup>, Jens Pfannstiel<sup>3</sup>, Katrin Ochsenreither<sup>2</sup>, and Thomas Eisele<sup>1\*</sup>

<sup>1</sup>Hochschule Offenburg, Faculty of Mechanical and Process Engineering, 77652 Offenburg, Germany

<sup>2</sup>Karlsruhe Institute of Technology (KIT), Department of Chemical and Process Engineering, 76131 Karlsruhe, Germany

<sup>3</sup>University of Hohenheim, Mass Spectrometry Unit Core Facility, 70599 Stuttgart, Germany

\*Corresponding author: thomas.eisele@hs-offenburg.de

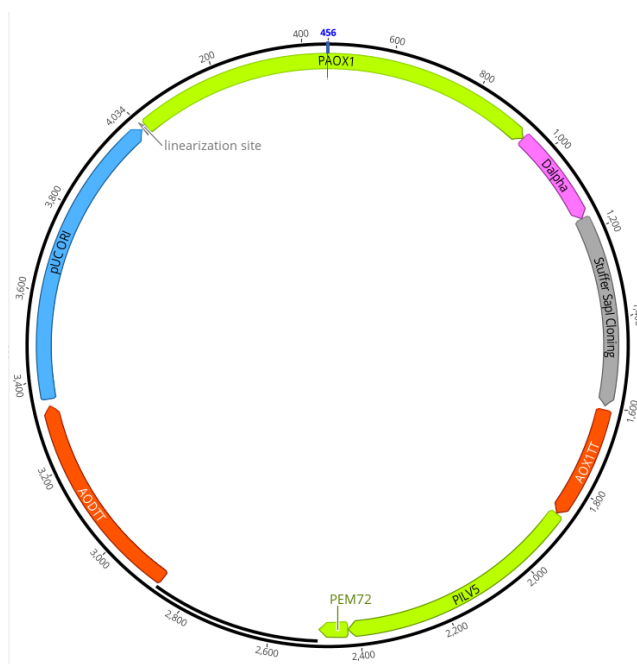

**Online resource 1** Plasmid map of pBSY2S1Z.

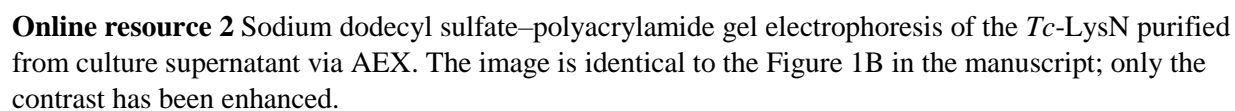

MFTISTVRATL IALAASAVAV SAERALSLKLV SGPEAVDGVQ NFKVTTTTLTN TGDESLKLLN DPRGALNTLP ANTFDIT TDS  
GEKPSFIVGK VKY VPRHAAQ STNEKSFVTL AGPESTSVTH DLSAAAYNFTL PGAAGYTVEP ANLFHYVDPE TNEPVEIRAD  
SEPHVAAVSG KLVAVRTPPT LTKRETYNGK SSSQKTGIOA AAPAAQTYVA NALSYLQTHT ASTARYTTFW GSYTSSRHST  
VLSHYTNNNG NDYSSEFYDC TCTESDTHAY VYPDDFGYIY LCGAFWQAPT TGTDS KGGTL VHESSHFTRN AGTQDYVYGQ  
SAAKSLAKSN PSEAI MNADN HEYFAENNPA OS

**Online resource 3** *Tc*-LysN sequence coverage of TMT-labeling experiment. E185 is the N-terminal TMT-labeled amino acid.

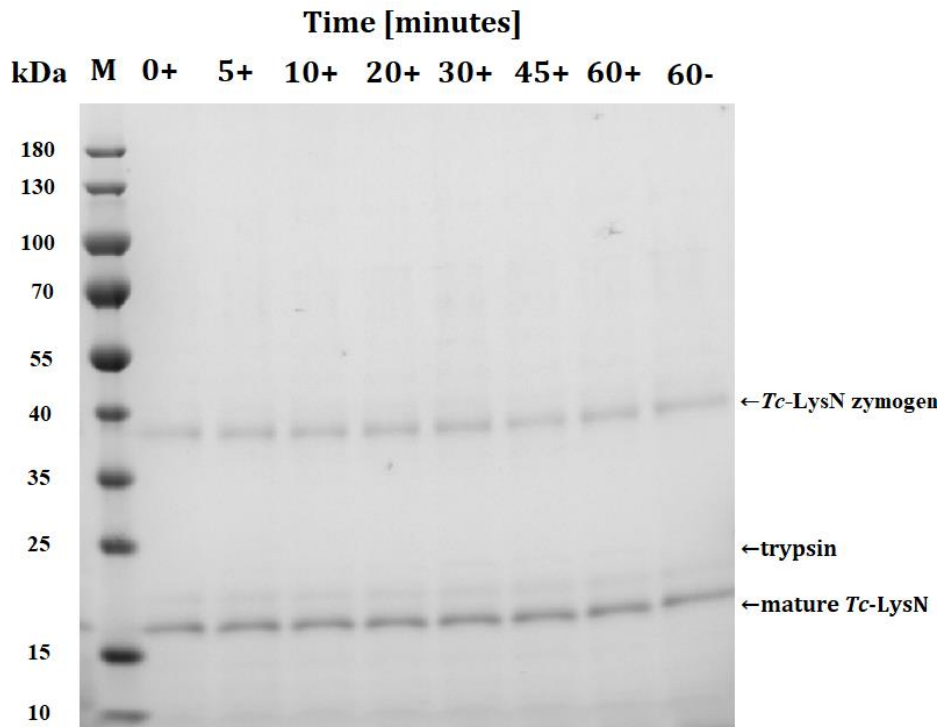

**Online resource 4** Sodium dodecyl sulfate–polyacrylamide gel electrophoresis of the concentrated *Tc-LysN* culture supernatant (24 hr induction) that was incubated with trypsin for 60 minutes. Samples were withdrawn at indicated time points and mixed with reducing sample loading at heated for 5 minutes at 90°C before being loaded onto the gel. The “+” indicates samples that were incubated with trypsin and the “-” sign indicates samples that weren’t incubated with trypsin. Lane M contains the marker proteins (PageRuler Prestained 10–180 kDa, Thermofisher).

Albumin OS=Bos taurus OX=9913 GN=ALB PE=1 SV=4  
78 exclusive unique peptides, 99 exclusive unique spectra, 205 total spectra, 507/607 amino acids (84% coverage)

|             |             |             |             |             |             |             |            |       |
|-------------|-------------|-------------|-------------|-------------|-------------|-------------|------------|-------|
| MKWVTFISLL  | LLFSSAYSRG  | VFRRDTHKSE  | IAHRFKDLGE  | EHFKGLVLIA  | FSQYLQCCPF  | DEHVKLVLNEL | TEFAKT     | C VAD |
| ESHAGCEKSL  | HTLFGDELCK  | VASLRETYGD  | MADCCCEKQEP | ERNECFLLSHK | DDSPDLPLKLL | PDPTNLCDEF  | KADEKK     | FWGK  |
| YLYEIAARRHP | YFYAPELLLY  | ANKYNGVFQEH | CCQAECKGAC  | LLPKIETMBE  | KVLASSARQR  | LRCAISIQKFG | ERALKAWSVA |       |
| RLSQKFPKAE  | FVEVTKLVTYD | LTKVHKECCH  | GDLLLECAADR | ADLAKYICDN  | QDTISSKLKE  | CCDKPLLEKS  | HCIAEVEKDA |       |
| IPENLPPLTA  | DFAEDKDVCK  | NYQEAQDAFL  | GSFLYEYSRR  | HPEYAVSVLL  | RLAKEYEATL  | EECCAKDDPH  | ACYSTVFQDL |       |
| KHLVDEPQNL  | IKQNCDDQFEK | LGEYGFQNAL  | IVRYTRKVPO  | VSTPTLVEVS  | RSLGKVGTRC  | CTKPESERMP  | CTEDYLSLIL |       |
| NRLCVLHEKT  | PVSEKVTKCC  | TESLVNRRPC  | FSALTPDETY  | VPKAFDEKLF  | TFHADICTLP  | DTEKQIKKQT  | ALVELLKHKP |       |
| KATEEQLKTV  | MENFVAFVDK  | CCAADDKEAC  | FAVEGPKLVV  | STQTALA     |             |             |            |       |

**Online resource 5** Peptide sequence coverage of the in-solution digest of bovine serum albumin with *Tc-LysN*.
